# Supplementary material for: Prolonged sleep deprivation induces cardiac dysfunction via microglia-neural circuit coupling
Source: Research Square preprint supplement (doi:10.21203/rs.3.rs-7329226/v1), 2025-09-04
Supplement: Supplementary file 1 [file 091f9c50f7f029ad3cc287b3.docx]

Supporting Information

**Prolonged sleep deprivation induces cardiac dysfunction via microglia-neural circuit coupling**

**Fan ZHANG,1,5,6 Wen-jing SHAO,2,5 Nai-xuan WEI, 2 Wei-LIU,2 Zhi-hao XU, 2 Zheng-jie LUO,2 Yan-WU, 2 Jian-qing YU, 2 Qi SHU, 2 Xiang ZHOU, 2 Ling HU,2, 3 Guo-ming SHEN, 1, * Qing YU,2, 3, *** **Rong-lin CAI,2,3,4,7,***

1College of Integrated Chinese and Western Medicine, Anhui University of Chinese Medicine, Hefei, Anhui Province, China

2College of Acupuncture and moxibustion, Anhui University of Chinese Medicine, Hefei, Anhui Province, China

3Anhui Provincial Key Laboratory of Meridian-Viscera Correlation, Hefei, Anhui Province, China

4Key Laboratory of Xin’an Medicine, Ministry of Education, Anhui University of Chinese Medicine, Hefei, China

5These authors contributed equally to this work

6Technical contact

7Lead contact

*Correspondence:

shengm_66@163.com(G. S.)

yuqingtcm@126.com (Q.Y.)

ronglincai@ahtcm.edu.cn (R.C.)

This file includes

Supplementary information

Supplementary Figures 1-3

Supplementary Table 1

Supplementary Table 2


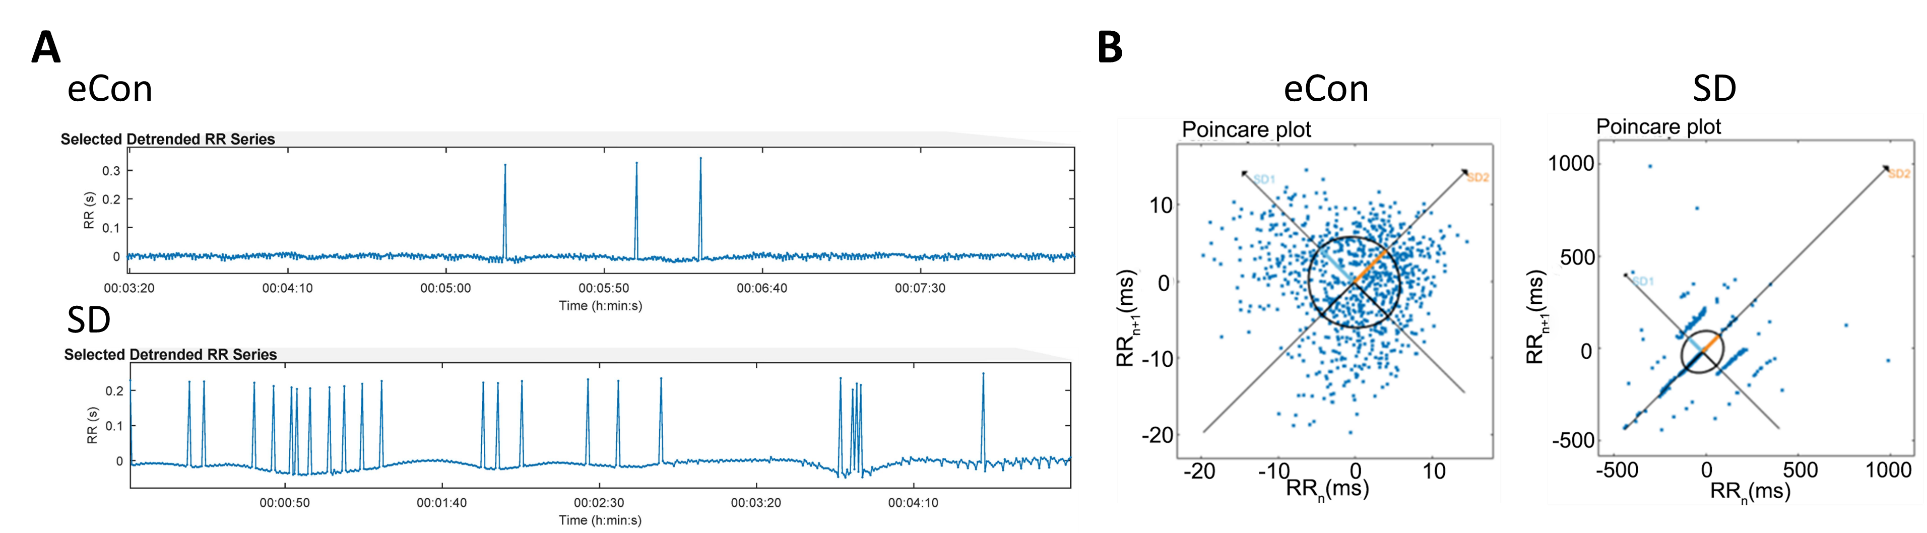


**Figure S1. The HRV Analysis of sleep-deprived mice.** **(A)** Typical RR tracks of severe cardiac arrhythmias in SD mice. **(B)** HRV Poincaré Plot Analysis in SD mice.


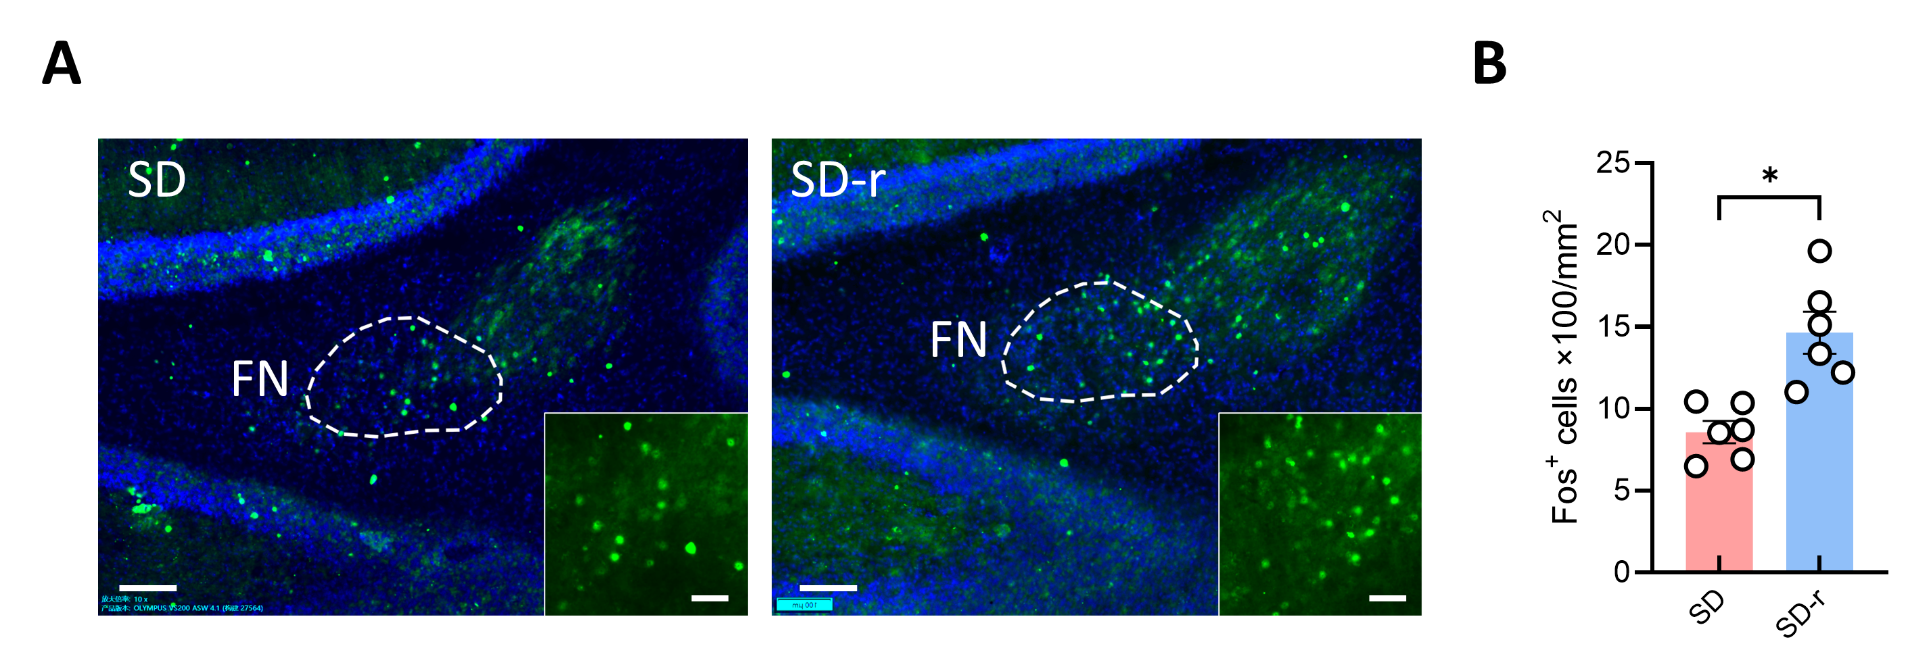


**Figure S2. The expression of c-Fos signaling in the frontal neocortex (FN) of sleep-deprived recover mice.** **(A)** Images showing the distribution of c-Fos-positive neurons in the FN in SD or SD-r mice. Scale bars, 200 μm. FN: The images depicting the area shown in the White dashed line. Scale bars, 50 μm. **(B)** Statistic data showing the distribution of c-Fos-positive neurons in the FN in SD or SD-r mice.


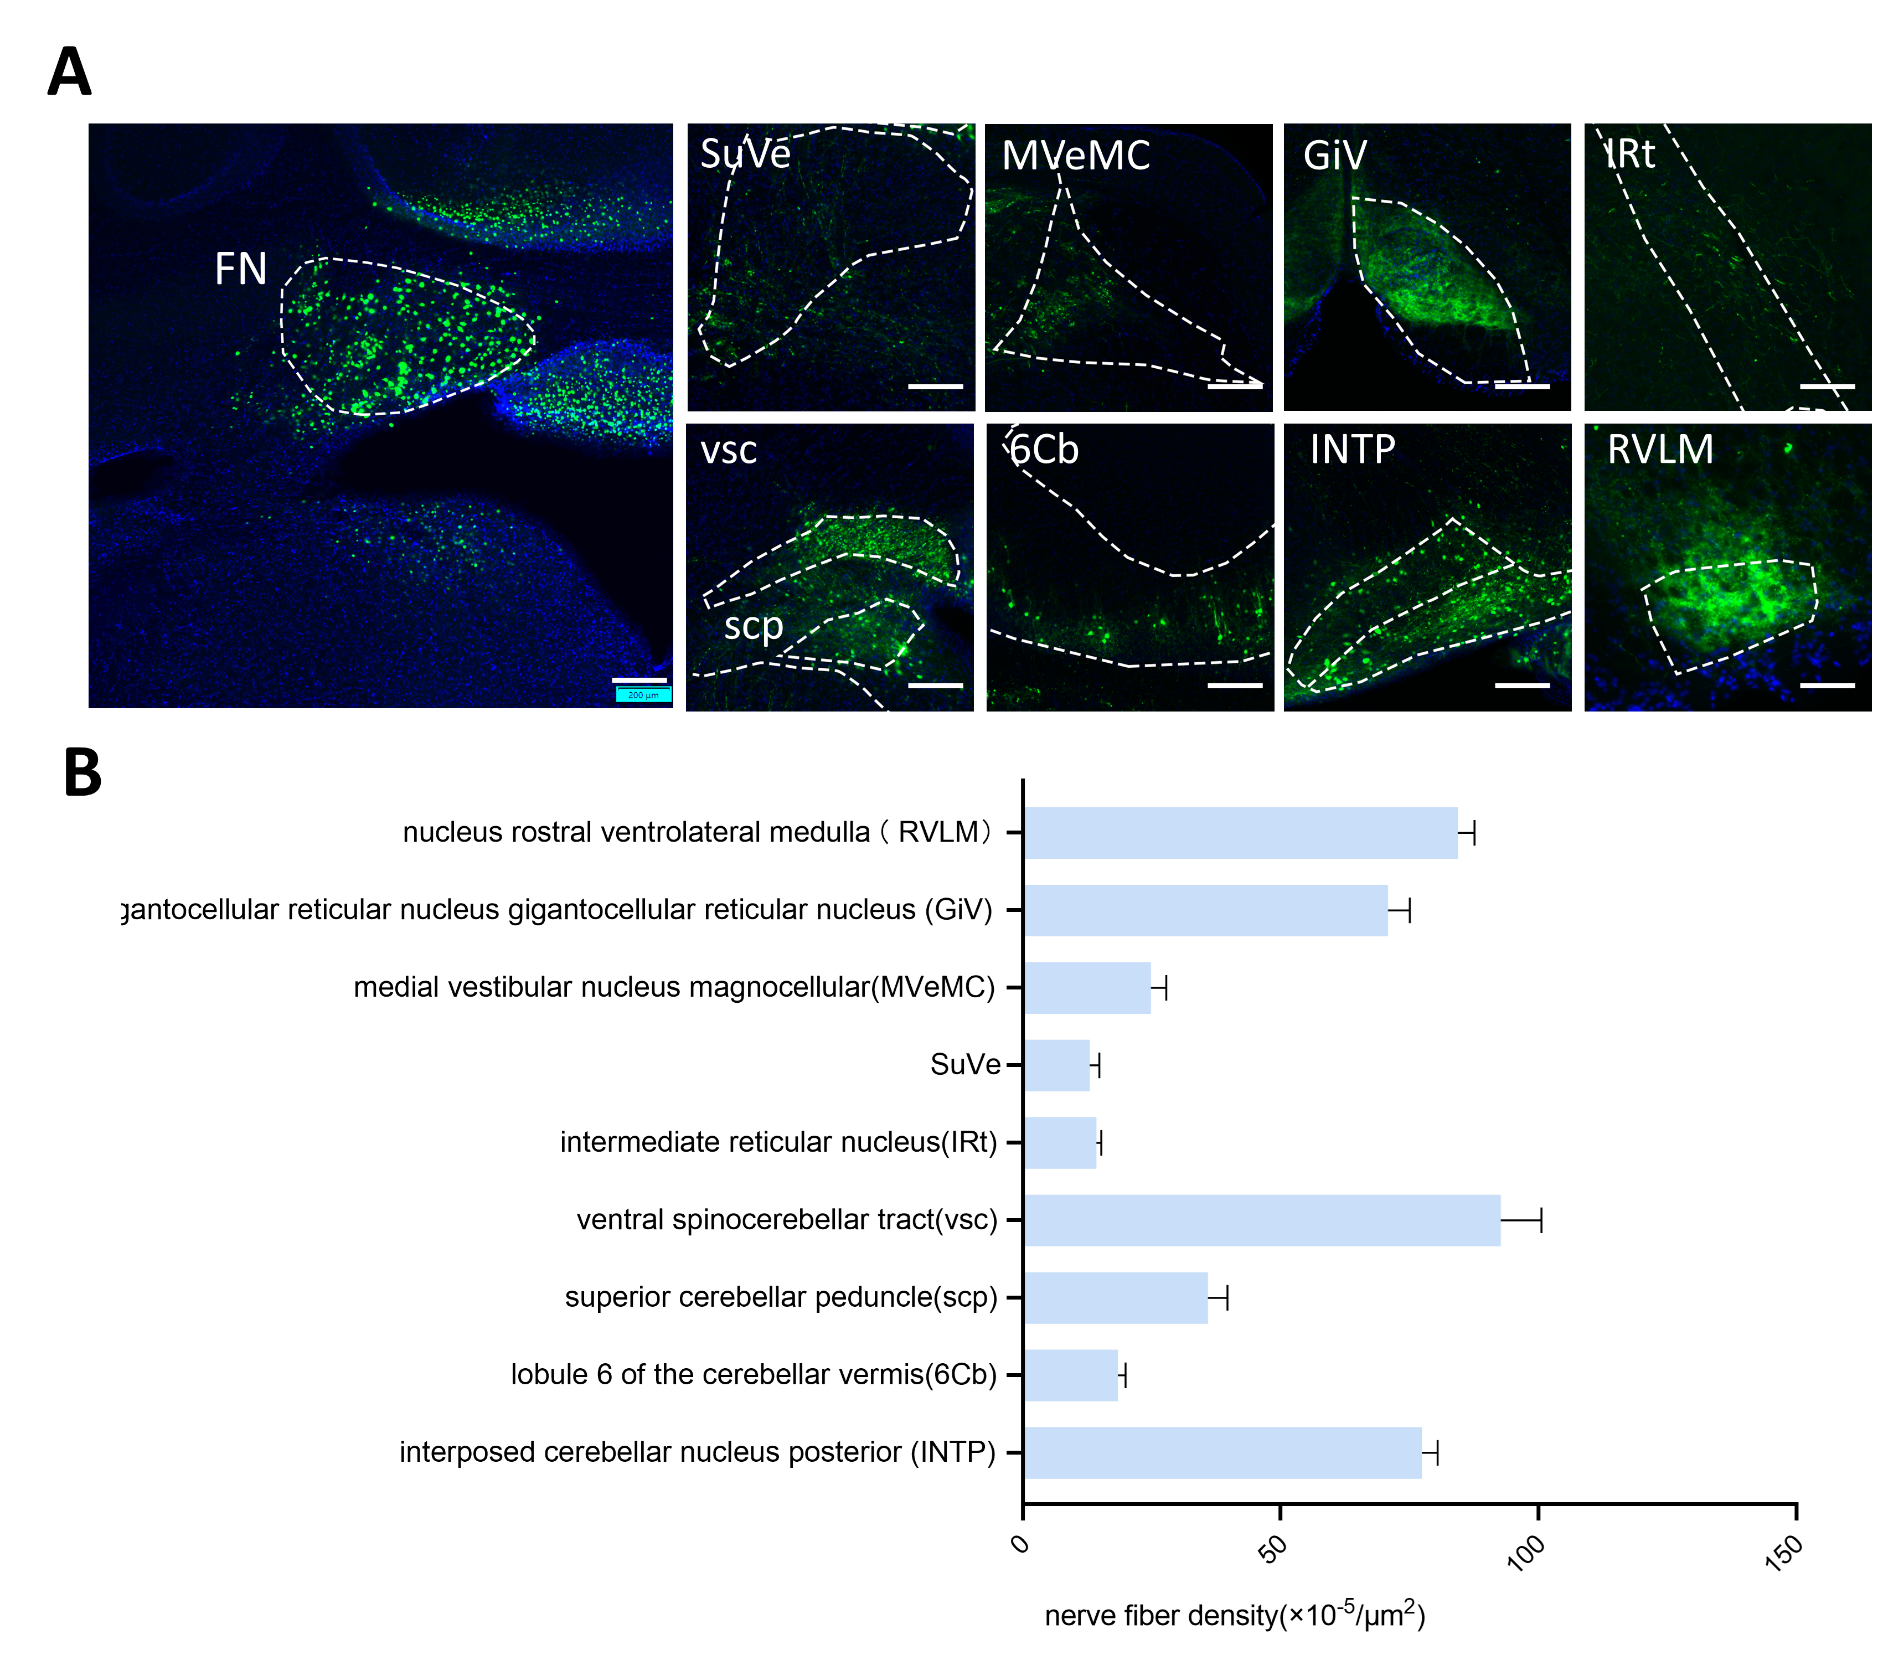


**Figure S3.** **(A, B)** Representative image(A) and data(B) of virals-labeled output eGFP-fibers across different brain areas to the FN infusion virus(rAAV- -DIO-eGFP) of vgat-mice. (Scale bars, 100 μm (overview) and 20 μm (zoom), n=4 mice ).

**KEY RESOURCES TABLE**

| **REAGENT or RESOURCE** | **SOURCE** | **IDENTIFIER** |
| --- | --- | --- |
| **Antibodies** |  |  |
| rabbit Anti-Glutamate | Sigma | Cat. No. G6642 |
| rabbit Anti-GABA | Sigma | Cat. No. A2052 |
| rabbit Anti-Iba-1 | Wako | Cat. No. 019-19741 |
| mouse Anti-CD68 | abcam | Cat. No. ab955 |
| goat Anti-PSD95 | abcam | Cat. No. ab317793 |
| Alexa Fluor™ 488, donkey anti-rabbit | abcam | Cat. No. ab150061 |
| Alexa Fluor™ 594, donkey anti-goat | abcam | Cat. No. ab150132 |
| Alexa Fluor™ 647, and donkey anti-mouse | abcam | Cat. No. ab150107 |
| Alexa Fluor® 488，goat anti-Guinea pig IgG H&L | abcam | ab150185 |
| Anti-c-Fos antibody -BSA free | abcam | AB190289 |
|  |  |  |
|  |  |  |
| **Chemicals, peptides, and recombinant proteins** |  |  |
| SDS-PAGE protein loading buffer | Solarbio | S8010,723T033 |
| PVDF membrane | Millipore | IPVH00010 |
| ECL luminescent kit | Thermo Fisher | VC298015 |
| rAAV/11-hSyn-EGFP | braincase | BC230901-0020-11 |
| rAAV/9-TRE-tight-hM4D(Gi)-mCherry (titer: 3.12E+12 vg/mL) | braincase | BC221104-0151-9 |
| rAAV/9-cFos-tTA-NLS-FLAG (titer: 5.01E+12 vg/mL) | braincase | BC221104-0151-9 |
| rAAV2/9-EF1a-DIO-Ypet-2A-mGFP-WPRE-pA (titer: 5.13E+12 vg/mL) | brainvta | 9-593-K240830 |
| rAAV2/9-mVGAT1-Cre(titer: 3.75E+12 vg/mL) | braincase | BC-230106-1723-9 |
| rAAV2/9-EF1a-DIO-hM3D(Gq)-mCherry-WPREs (titer: 5.04E+12 vg/mL) | brainvta | 9-42-S240304 |
| rAAV2/9-EF1a-DIO-Hm4D(Gi)-mCherry-WPREs (titer: 5.32E+12 vg/mL) | brainvta | 9KC-43-Z240319A |
| rAAV/9-EF1a-DIO-GCaMP6m (titer: 5.22E+12 vg/mL) | braincase | BC230119-0087-9 |
| rAAV2/MG1.2-Iba1-EGFP-WPREs (titer:5.31E+12 vg/mL) | brainvta | MG1.2-9623-K240112 |
| rAAV/11-mIBA1-EGFP-WPRE-4XmiR9T(titer:1.01E+13 vg/mL） | braincase | BC240726-ZA0182-11 |
| rAAV2/R-hSyn-CRE-WPRE-hGH（titer: 5.27E+12 vg/mL） | brainvta | 9-136-S240804 |
| rAAV2/9-EF1a-DIO-hChR2(H134R)-EYFP-WPRE-hGH（titer: 6.08E+12 vg/mL） | brainvta | 9-1-S241029 |
| AAV/9-CaMKIIa-FCSSP-EYFP-5E4(titer: 5.07E+12 vg/mL） | braincase | BC240719-SL014-9 |
| rAAV2/9-hSyn-DIO-EGFP-WPRE-Hgh(titer:5.90E+12 vg/mL) | brainvta | 9-1103-K240625 |
| Clozapine N-oxide(CNO) | brainvta | CNO-240429 |
| **Software and algorithms** |  |  |
| Imaris | BITPLANE | 9.0.1(Sep 5 2017) |
| GrapePad Prism | GraphPad Software，Inc | 8.0 |
| Kubios HRV Standard | Kubios | 3.5.0 |
| IBM SPSS Statistics | International Business Machines Corp | 23 |
| MATLAB | MathWorks | R2018a（9.4.0.813654） |
| LabChart | ADINSTRUMENTS | V8.1.19 |
| **Other** |  |  |
| Confocal microscope | Olympus | FV1000 |
| Fiber photometric recording system | ThinkerTech Co., Ltd | N/A |
| In vivo electrophysiological recording system | Plexon | N/A |
| ML118 Animal Bio Amp | AD Instruments, Sydney, Australia | N/A |
| Electronic acupuncture instrument | Suzhou Medical supplies Factory Co., Ltd, Suzhou, China | SDZ- III type |
| Minocycline hydrochloride(Mino) | SparkJade | SJ-MA0143 |
| Lipopolysaccharide（ LPS） | WOCAS | L2880 |
| Artificial Cerebrospinal Solution（(aCSF) | WOCAS | PH1851 |
| Doxycycline Hyclate(Dox) | SparkJade | SJ-MA0058B |

**RESOURCE AVAILABILITY**

**Lead contact**

Further information and requests for resources and reagents should be directed to and will be fulfilled by the lead contact, Rong-lin CAI **(**ronglincai@ahtcm.edu.cn**).**

**Materials availability**

This study did not generate unique reagents.

**Data and code availability**

All data are available in the main text or the supplementary materials. This paper does not report original code. Any additional information required to reanalyse the data reported in this paper is available from the lead contact upon request.

**Supplementary Table 2. Statistical analyses related to Figures 1-6 and Supplementary Figures 1.**

| **Figure** | **Conditions (sample size)** | **Analysis** | ***P value*** | **t or F value** |
| --- | --- | --- | --- | --- |
| Figure 1H | eCon(6) vs. hCon(6) | One-way ANOVA | 0.9986 |  |
| hCon(6) vs. SD(6) | 0.0059 |  |
| eCon(6) vs. SD(6) | 0.0065 |  |
| Figure 1I | eCon(6) vs. hCon(6) | One-way ANOVA | 0.9960 |  |
| hCon(6) vs. SD(6) | 0.0336 |  |
| eCon(6) vs. SD(6) | 0.0396 |  |
| Figure 1K | eCon(6) vs. hCon(6) | One-way ANOVA | 0.9765 |  |
| hCon(6) vs. SD(6) | 0.9526 |  |
| eCon(6) vs. SD(6) | 0.8699 |  |
| Figure 1L | eCon(6) vs. hCon(6) | One-way ANOVA | 0.8876 |  |
| hCon(6) vs. SD(6) | 0.0424 |  |
| eCon(6) vs. SD(6) | 0.0171 |  |
| Figure 1M | eCon(6) vs. hCon(6) | One-way ANOVA | 0.9991 |  |
| hCon(6) vs. SD(6) | 0.9822 |  |
| eCon(6) vs. SD(6) | 0.9893 |  |
| Figure 1O | eCon(24) vs. hCon(24) | One-way ANOVA | 0.9982 |  |
| hCon(24) vs. SD(24) | 0.0025 |  |
| eCon(24) vs. SD(24) | 0.0030 |  |
| Figure 1P | eCon(24) vs. hCon(24) | One-way ANOVA | 0.9384 |  |
| hCon(24) vs. SD(24) | 0.0001 |  |
| eCon(24) vs. SD(24) | 0.0003 |  |
| Figure 1Q | eCon(24) vs. hCon(24) | One-way ANOVA | 0.9983 |  |
| hCon(24) vs. SD(24) | <0.0001 |  |
| eCon(24) vs. SD(24) | <0.0001 |  |
| Figure 1R | eCon(24) vs. hCon(24) | One-way ANOVA | 0.9946 |  |
| hCon(24) vs. SD(24) | 0.0049 |  |
| eCon(24) vs. SD(24) | 0.0065 |  |
| Figure 2F(1) | Con(34) vs. SD(9) | Unpaired t-test | 0.8240 | t=0.2239, df=42 |
| Figure 2F(2) | Con(46) vs. SD(23) | Unpaired t-test | 0.0007 | t=3.559, df=67 |
| Figure 2F(3) | Con(24) vs. SD(11) | Unpaired t-test | 0.5345 | t=0.6278, df=33 |
| Figure 2K | Control+mCherry(6) vs. SD+mCherry(6) | One-way ANOVA | 0.0158 |  |
| SD+mCherry (6) vs. SD+ChR2+mCherry (6) | 0.0451 |  |
| Figure 2L | Control+mCherry(6) vs. SD+mCherry(6) | One-way ANOVA | 0.0012 |  |
| SD+mCherry (6) vs. SD+ChR2+mCherry (6) | 0.0108 |  |
| Figure 2M | Control+mCherry(6) vs. SD+mCherry(6) | One-way ANOVA | 0.0127 |  |
| SD+mCherry (6) vs. SD+ChR2+mCherry (6) | 0.0420 |  |
| Figure 2N | Control+mCherry(6) vs. SD+mCherry(6) | One-way ANOVA | 0.0032 |  |
| SD+mCherry (6) vs. SD+ChR2+mCherry (6) | 0.0140 |  |
| Figure 2O | Control+mCherry(6) vs. SD+mCherry(6) | One-way ANOVA | 0.0165 |  |
| SD+mCherry (6) vs. SD+ChR2+mCherry (6) | 0.0288 |  |
| Figure 2P | Control+mCherry(6) vs. SD+mCherry(6) | One-way ANOVA | 0.0011 |  |
| SD+mCherry (6) vs. SD+ChR2+mCherry (6) | 0.0042 |  |
| Figure 3E | Control(6) vs. SD (6) | paired t-test | 0.0010 | t=6.865, df=5 |
| SD (6) vs. SD-r (6) | 0.0458 | t=2.643, df=5 |
| Figure 3F | Control(6) vs. SD (6) | paired t-test | 0.0137 | t=3.724, df=5 |
| SD (6) vs. SD-r (6) | 0.0264 | t=3.114, df=5 |
| Figure 3J | SD+mCherry (11) vs. SD+hM3Dq+mCherry (16) | paired t-test | 0.0400 | t=2.208, df=18.65 |
| Figure 3K | Control+mCherry(6) vs. SD+mCherry(6) | One-way ANOVA | 0.0486 |  |
| SD+mCherry (6) vs. SD+ hM3Dq+mCherry (6) | 0.0179 |  |
| Figure 3L | Control+mCherry(6) vs. SD+mCherry(6) | One-way ANOVA | 0.0010 |  |
| SD+mCherry (6) vs. SD+ hM3Dq+mCherry (6) | 0.0351 |  |
| Figure 3M | Control+mCherry(6) vs. SD+mCherry(6) | One-way ANOVA | 0.0007 |  |
| SD+mCherry (6) vs. SD+ hM3Dq+mCherry (6) | 0.0194 |  |
| Figure 3N | Control+mCherry(6) vs. SD+mCherry(6) | One-way ANOVA | 0.0040 |  |
| SD+mCherry (6) vs. SD+ hM3Dq+mCherry (6) | 0.0258 |  |
| Figure 3O | Control+mCherry(6) vs. SD+mCherry(6) | One-way ANOVA | 0.0471 |  |
| SD+mCherry (6) vs. SD+ hM3Dq+mCherry (6) | 0.0015 |  |
| Figure 3O | Control+mCherry(6) vs. SD+mCherry(6) | One-way ANOVA | 0.0020 |  |
| SD+mCherry (6) vs. SD+ hM3Dq+mCherry (6) | 0.0107 |  |
| Figure 3R | Control+mCherry(6) vs. SD+mCherry(6) | One-way ANOVA | 0.0438 |  |
| SD+mCherry (6) vs. SD+ hM3Dq+mCherry (6) | 0.0278 |  |
| Figure 3S | Control+mCherry(6) vs. SD+mCherry(6) | One-way ANOVA | 0.0184 |  |
| SD+mCherry (6) vs. SD+ hM3Dq+mCherry (6) | 0.1868 |  |
| Figure 3T | Control+mCherry(6) vs. SD+mCherry(6) | One-way ANOVA | 0.0003 |  |
| SD+mCherry (6) vs. SD+ hM3Dq+mCherry (6) | 0.0470 |  |
| Figure 4B | Control(6) vs. SD12h(6) | One-way ANOVA | 0.0436 |  |
| SD12h(6) vs. SD24h(6) | 0.0013 |  |
| Figure 4C | Control(6) vs. SD12h(6) | One-way ANOVA | 0.0356 |  |
| SD12h(6) vs. SD24h(6) | 0.0057 |  |
| Figure 4D | Control(6) vs. SD12h(6) | One-way ANOVA | 0.3706 |  |
| SD12h(6) vs. SD24h(6) | 0.0040 |  |
| Figure 4E | Control(6) vs. SD12h(6) | One-way ANOVA | 0.0240 |  |
| SD12h(6) vs. SD24h(6) | 0.0324 |  |
| Figure 4G | SD+ACSF(6) vs. SD+Mino(6) | Unpaired t-test | 0.0284 | t=2.559, df=10 |
| Figure 4H | SD+ACSF(6) vs. SD+Mino(6) | Unpaired t-test | 0.6307 | t=0.4959, df=10 |
| Figure 4I | SD+ACSF(6) vs. SD+Mino(6) | Unpaired t-test | 0.0291 | t=2.545, df=10 |
| Figure 4J | SD+ACSF(6) vs. SD+Mino(6) | Unpaired t-test | 0.0225 | t=2.696, df=10 |
| Figure 4K | SD+ACSF(6) vs. SD+Mino(6) | Unpaired t-test | 0.0024 | t=4.041, df=10 |
| Figure 4M | SD+ACSF(24) vs. SD+Mino(24) | Unpaired t-test | <0.0001 | t=8.512, df=46 |
| Figure 4N | SD+ACSF(24) vs. SD+Mino(24) | Unpaired t-test | <0.0001 | t=7.642, df=46 |
| Figure 4O | SD+ACSF(24) vs. SD+Mino(24) | Unpaired t-test | 0.1000 | t=1.679, df=46 |
| Figure 4P | SD+ACSF(24) vs. SD+Mino(24) | Unpaired t-test | <0.0001 | t=9.129, df=46 |
| Figure 4R | SD+ACSF(12) vs. SD+Mino(19) | Unpaired t-test | 0.1131 | t=1.634, df=29 |
| Figure 4S | SD+ACSF(6) vs. SD+Mino(6) | Unpaired t-test | 0.0254 | t=2.625, df=10 |
| Figure 5C | Control(6) vs. SD(6) | Unpaired t-test | 0.0328 | t=2.475, df=10 |
| Figure 5E | Control(6) vs. SD(6) | Unpaired t-test | 0.0061 | t=3.462, df=10 |
| Figure 5G | Control(48) vs. SD(48) | Unpaired t-test | <0.0001 | t=4.318, df=94 |
| Figure 5J | Control(6) vs. SD(6) | Unpaired t-test | 0.0166 | t=2.872, df=10 |
| Figure 5L | SD+ACSF(12) vs. SD+Mino(19) | Unpaired t-test | 0.1131 | t=1.634, df=29 |
| Figure 5N | SD+Saline(6) vs. SD+Mino(6) | Unpaired t-test | 0.1247 | t=1.676, df=10 |
| Figure 6G | Control(6) vs. SD(6) | Unpaired t-test | 0.0427 | t=2.321, df=10 |
| Figure 6K | Control+mCherry(6) vs. SD+mCherry(6) | One-way ANOVA | 0.0082 |  |
| SD+mCherry (6) vs. SD+ ChR2+mCherry (6) | 0.0344 |  |
| Figure 6L | Control+mCherry(6) vs. SD+mCherry(6) | One-way ANOVA | 0.0017 |  |
| SD+mCherry (6) vs. SD+ ChR2+mCherry (6) | 0.0349 |  |
| Figure 6M | Control+mCherry(6) vs. SD+mCherry(6) | One-way ANOVA | 0.0129 |  |
| SD+mCherry (6) vs. SD+ ChR2+mCherry (6) | 0.0078 |  |
| Figure 6N | Control+mCherry(6) vs. SD+mCherry(6) | One-way ANOVA | 0.0081 |  |
| SD+mCherry (6) vs. SD+ ChR2+mCherry (6) | 0.0309 |  |
| Figure 6O | Control+mCherry(6) vs. SD+mCherry(6) | One-way ANOVA | 0.0138 |  |
| SD+mCherry (6) vs. SD+ ChR2+mCherry (6) | 0.0140 |  |
| Figure 6P | Control+mCherry(6) vs. SD+mCherry(6) | One-way ANOVA | 0.0052 |  |
| SD+mCherry (6) vs. SD+ ChR2+mCherry (6) | 0.0500 |  |
| S Figure 1B | Control(6) vs. SD(6) | Unpaired t-test | 0.0026 |  |
| S Figure 1C | Control(6) vs. SD(6) | Unpaired t-test | 0.4750 |  |
| S Figure 1D | Control(6) vs. SD(6) | Unpaired t-test | 0.1445 |  |
